# Supplementary material for: Facile synthesis of membrane-embedded peptides utilizing lipid bilayer-assisted chemical ligationElectronic supplementary information (ESI) available: results of optimization of Ile-Cys ligation. Representative experimental procedure for the ligation. HPLC analyses of ligations of TMD 2 + 3 and TMD 6 + 7, and ISMS data of the resulting peptides. See http://www.rsc.org/suppdata/cc/b4/b404008b/
Source: Royal Society of Chemistry journal article supplement (doi:10.1039/b404008b), 2004-01-01
Supplement: b404008b.pdf [file b404008b.pdf]

## Facile synthesis of membrane-embedded peptides utilizing lipid bilayer-assisted chemical ligation

Akira Otaka,\* Satoshi Ueda, Kenji Tomita, Yoshiaki Yano, Hirokazu Tamamura,  
Katsumi Matsuzaki and Nobutaka Fujii

Graduate School of Pharmaceutical Sciences, Kyoto University  
Sakyo-ku, Kyoto 606-8501, Japan. E-mail: aotaka@pharm.kyoto-u.ac.jp

**Table S1** Optimization of native chemical ligation with Ile-Cys coupling site<sup>a</sup>

| H-Asn-Val-Ser-Glu-Ala-Asp-Arg-Tyr-Ile-S-(CH <sub>2</sub> ) <sub>2</sub> -CO-Ala-OH<br>CXCR4 (176-185) |                                                     |                 | H-Cys-OH                                                       | H-Asn-Val-Ser-Glu-Ala-Asp-Arg-Tyr-Ile-Cys-OH |      |
|-------------------------------------------------------------------------------------------------------|-----------------------------------------------------|-----------------|----------------------------------------------------------------|----------------------------------------------|------|
| Entry                                                                                                 | Solvent + Additives<br>(w/v %)                      | Temp<br>(°C)    | Thiol<br>(v/v%)                                                | Yields (%) <sup>d</sup>                      |      |
|                                                                                                       |                                                     |                 |                                                                | 24 h                                         | 54 h |
| 1                                                                                                     | Phosphate buffer <sup>b</sup>                       | 37              | PhSH (2%)                                                      | 22                                           | 34   |
| 2                                                                                                     | Phosphate buffer <sup>b</sup><br>2% TCEP, 0.1% EDTA | 20 <sup>c</sup> | PhSH (2%)                                                      | 50                                           | 71   |
| 3                                                                                                     | Phosphate buffer <sup>b</sup><br>2% TCEP, 0.1% EDTA | 20 <sup>c</sup> | HSCH <sub>2</sub> CH <sub>2</sub> SO <sub>3</sub> Na (2%, w/v) | 23                                           | 52   |
| 4                                                                                                     | Phosphate buffer <sup>b</sup><br>2% TCEP, 0.1% EDTA | 37              | PhSH (2%)                                                      | 62                                           | 88   |

<sup>a</sup> 1.5 equiv. of H-Cys-OH was used for the ligation reaction. <sup>b</sup> 0.2 mol dm<sup>-3</sup>, pH 7.8, <sup>c</sup> under Ar. <sup>d</sup> Yields were estimated from HPLC peak areas.

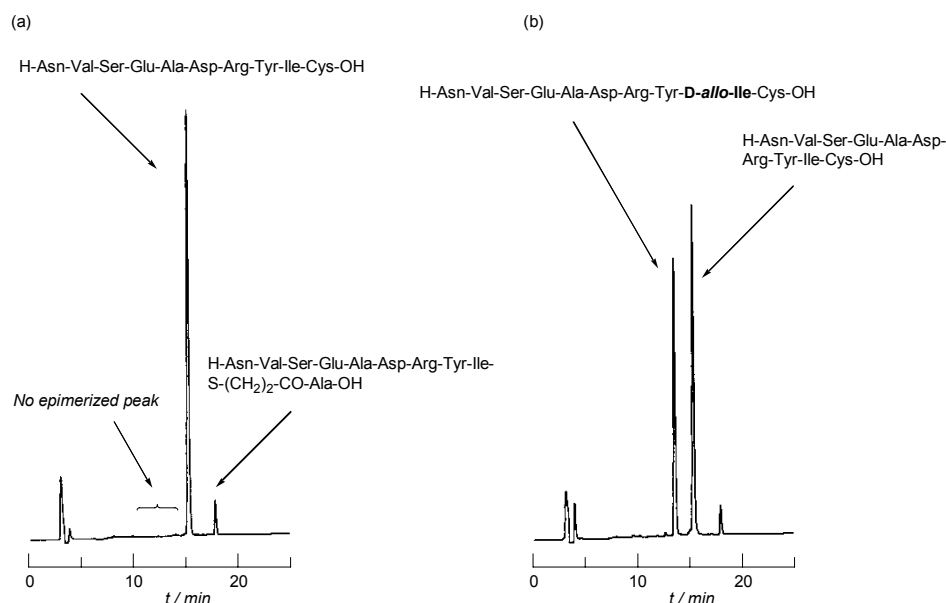

**Fig. S1** HPLC analyses of model ligation reaction. (a) Monitor of ligation of the model Ile (2*S*,3*S*) thioester with cysteine under condition listed in Table S1, entry 4 (54 h). (b) Co-injection of crude ligated product and D-*allo*-Ile (2*R*,3*S*)-containing peptide. Column: Cosmosil 5C<sub>18</sub> (4.6 x 250 mm); buffer A: 0.1% aq. TFA; buffer B: MeCN (0.1% TFA); linear gradient 20-35% B in A over 30 min; flow rate 1.0 cm<sup>3</sup> min<sup>-1</sup>; detect 280 nm.

Comparison of above HPLC analyses (a) and (b) indicated that the coupling reaction proceeded without any accompanying epimerized product.

**Representative Experimental Procedure for Chemical Ligation of TMD Peptides Embedded in Lipid Bilayer.** A mixture of N-terminal Cys peptide (0.06  $\mu\text{mol}$ ), thiolester peptide (0.06  $\mu\text{mol}$ ) and palmitoylthiolester peptide (POPC) (12.0 mmol) was dissolved in hexafluoro-2-propanol: $\text{CHCl}_3$  (1:4, 5  $\text{cm}^3$ ) or TFA (5  $\text{cm}^3$ ). Removal of solvents under reduced pressure gave the lipid/peptide mixed film on the surface of round-bottomed flask. The resulting mixed film was hydrated with 0.2 mol  $\text{dm}^{-3}$  phosphate buffer (pH 7.8, 1.2  $\text{cm}^3$ ) in the presence of tris(carboxyethyl)phosphine (2%, w/v) and EDTA (0.1%, w/v) and vortex-mixed. The mixture was subjected to ultrasonic treatment (1 min) followed by 10 freeze-thaw cycles to produce multilamellar vesicles (MLVs). To the MLVs suspension (1.2  $\text{cm}^3$ ) was added thiophenol (24  $\text{mm}^3$ ) to initiate the ligation reaction, and the reaction was kept at 37  $^\circ\text{C}$ . After 24 h reaction, reaction aliquot (50  $\text{mm}^3$ ) was treated with TFA (50  $\text{mm}^3$ ) to dissolve the peptides and lipid. The resulting solution was subjected to reversed phase HPLC analysis on C4 column using linear gradient elution [60-100 % B in A over 30 min; A:  $\text{H}_2\text{O}$ - $\text{HCO}_2\text{H}$  (3:2); B: 2-propanol- $\text{HCO}_2\text{H}$  (1:4); flow rate 0.65  $\text{cm}^3 \text{min}^{-1}$ ], and the eluted peaks were analyzed by ion-spray mass.

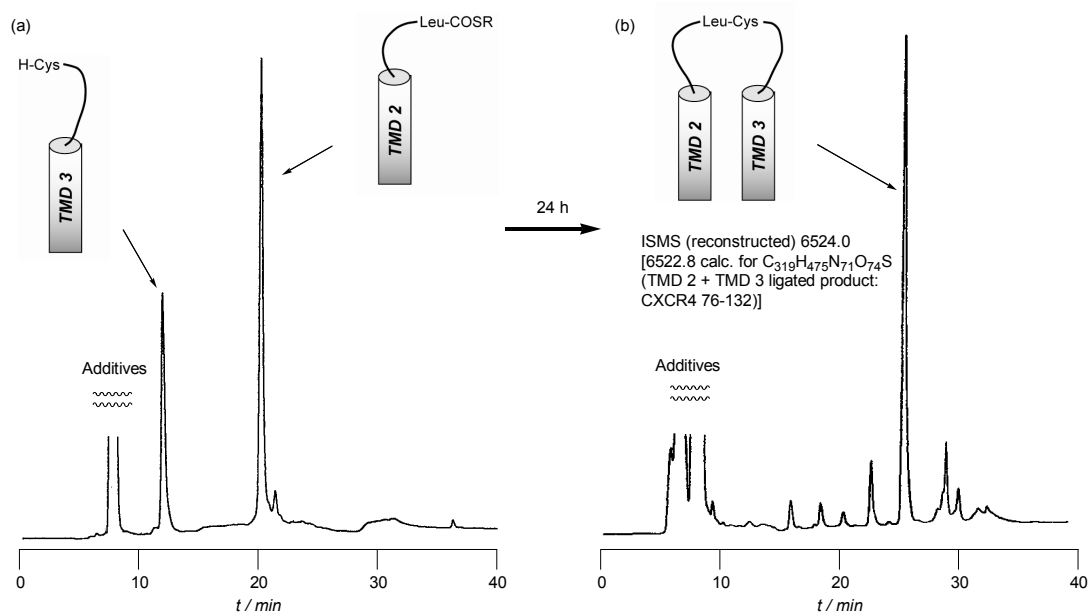

**Fig. S2** HPLC analysis of ligation progress in the reaction of TMD 2 with TMD 3 under lipid bilayer assisted condition: (a)  $t = 0$  h (reaction time). (b)  $t = 24$  h. Column: Cosmosil 5C<sub>4</sub> (4.6 x 150 mm); buffer A:  $\text{H}_2\text{O}$ - $\text{HCO}_2\text{H}$  (3:2); B: 2-propanol- $\text{HCO}_2\text{H}$  (1:4); linear gradient 60-100% B in A over 30 min; flow rate 0.65  $\text{cm}^3 \text{min}^{-1}$ ; detect 280 nm.

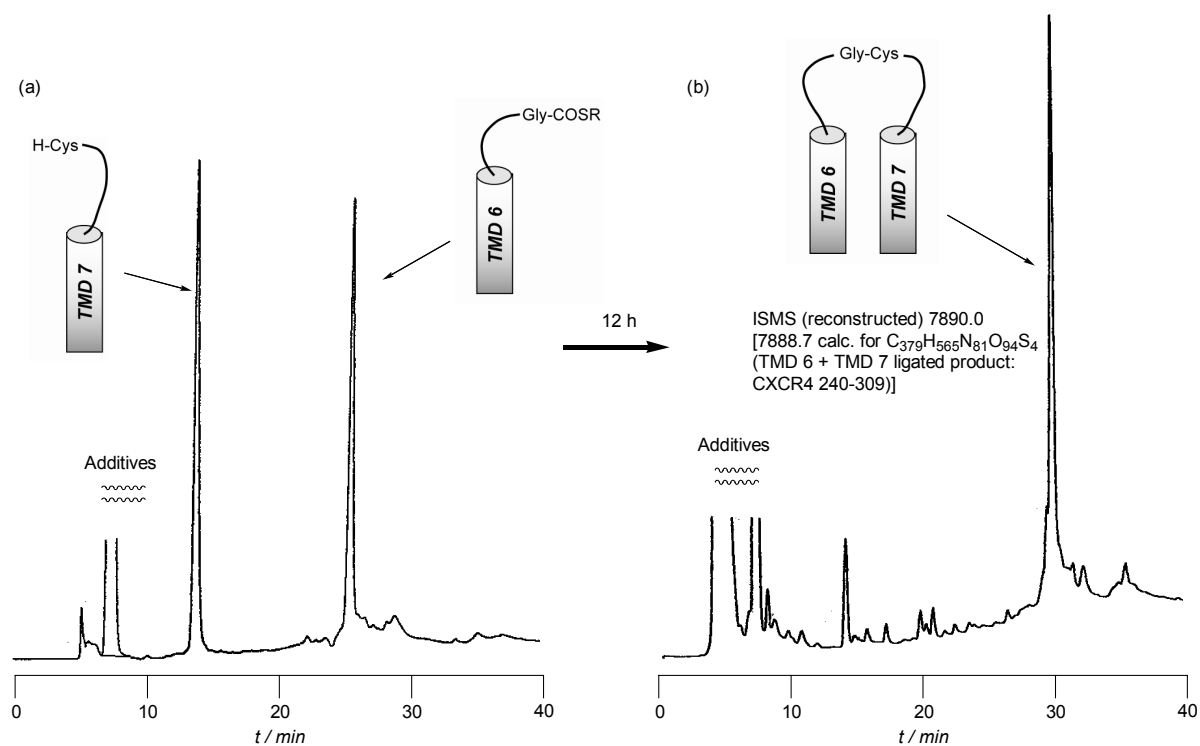

**Fig. S3** HPLC analysis of ligation progress in the reaction of TMD 6 with TMD 7 under lipid bilayer assisted condition: (a)  $t = 0$  h (reaction time). (b)  $t = 12$  h. Column: Cosmosil 5C<sub>4</sub> (4.6 x 150 mm); buffer A: H<sub>2</sub>O-HCO<sub>2</sub>H (3:2); B: 2-propanol-HCO<sub>2</sub>H (1:4); linear gradient 60-100% B in A over 30 min; flow rate 0.65 cm<sup>3</sup> min<sup>-1</sup>; detect 280 nm.
